# Supplementary material
Source: publisher figshare collection journal article supplement (https://frontiersin.figshare.com/ndownloader/files/34659844)

Supplementary Table 1

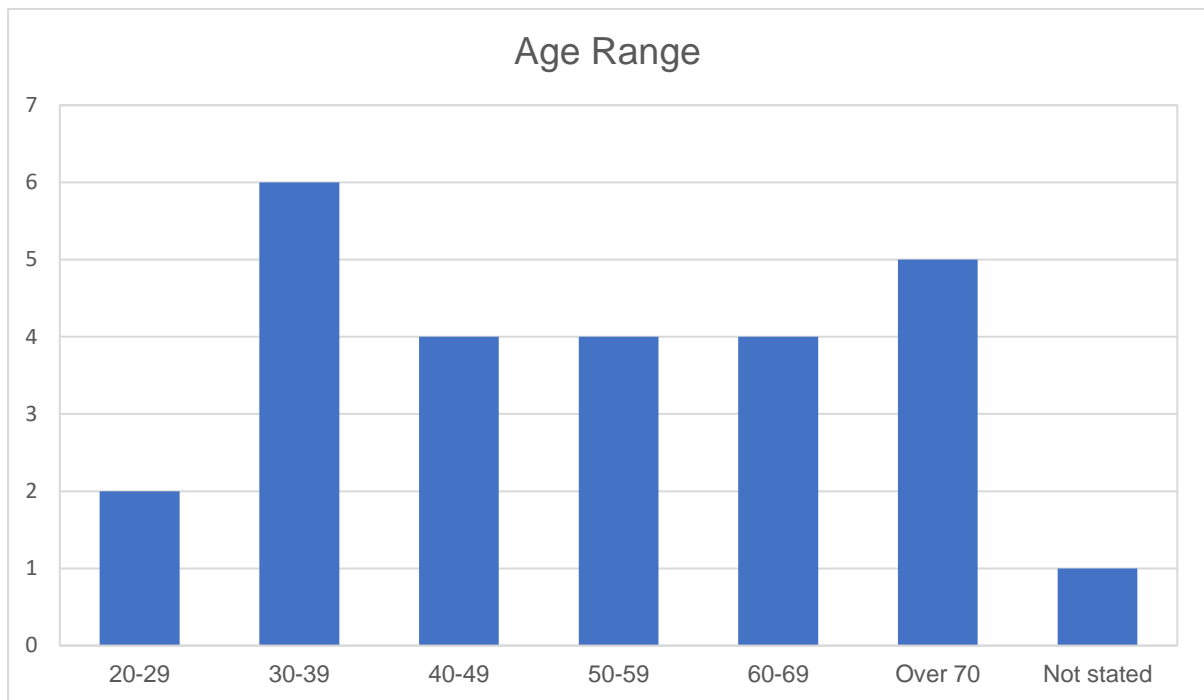

Supplementary Table 2

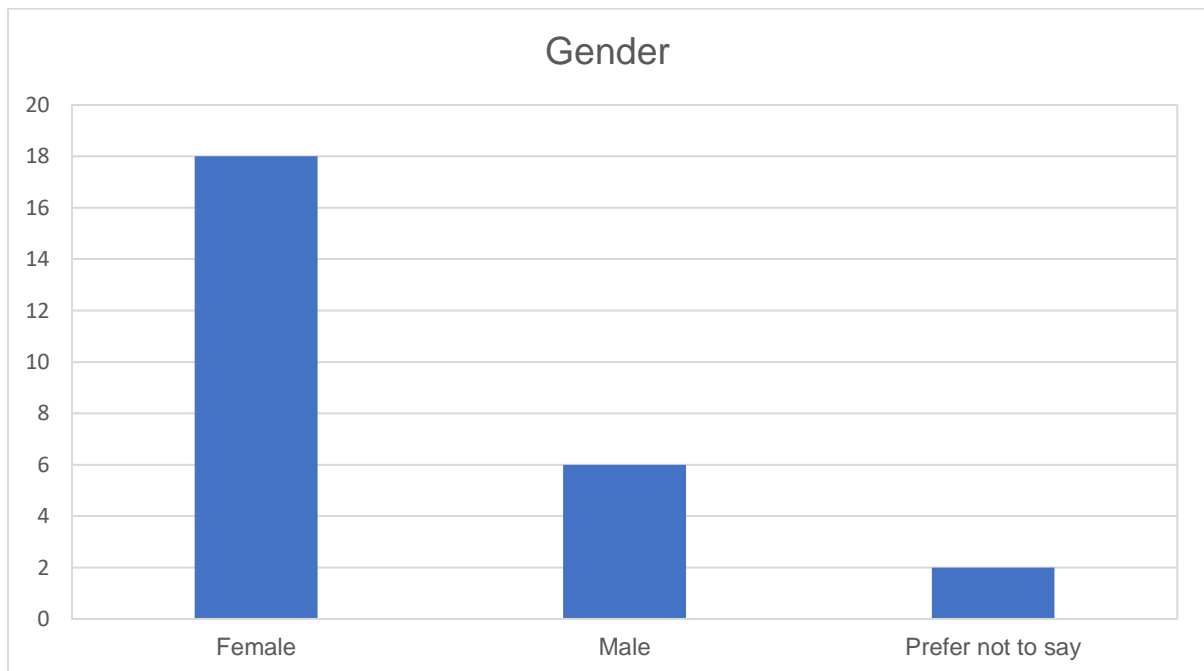

Supplementary Table 3

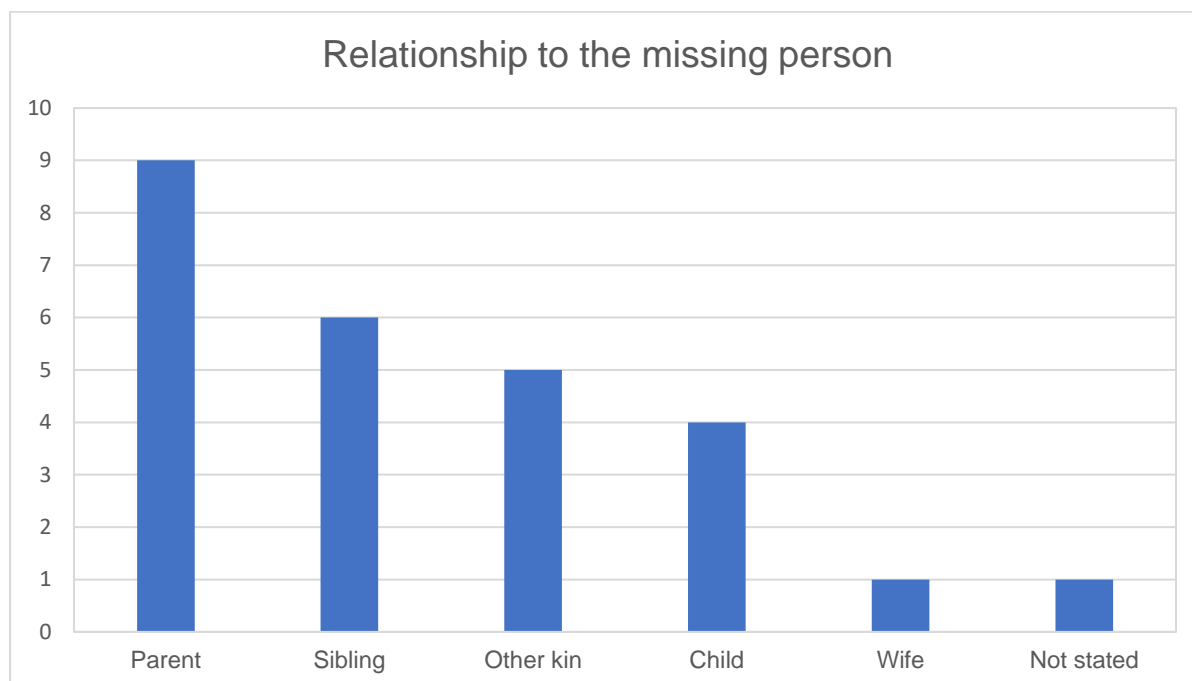

Supplementary Table 4

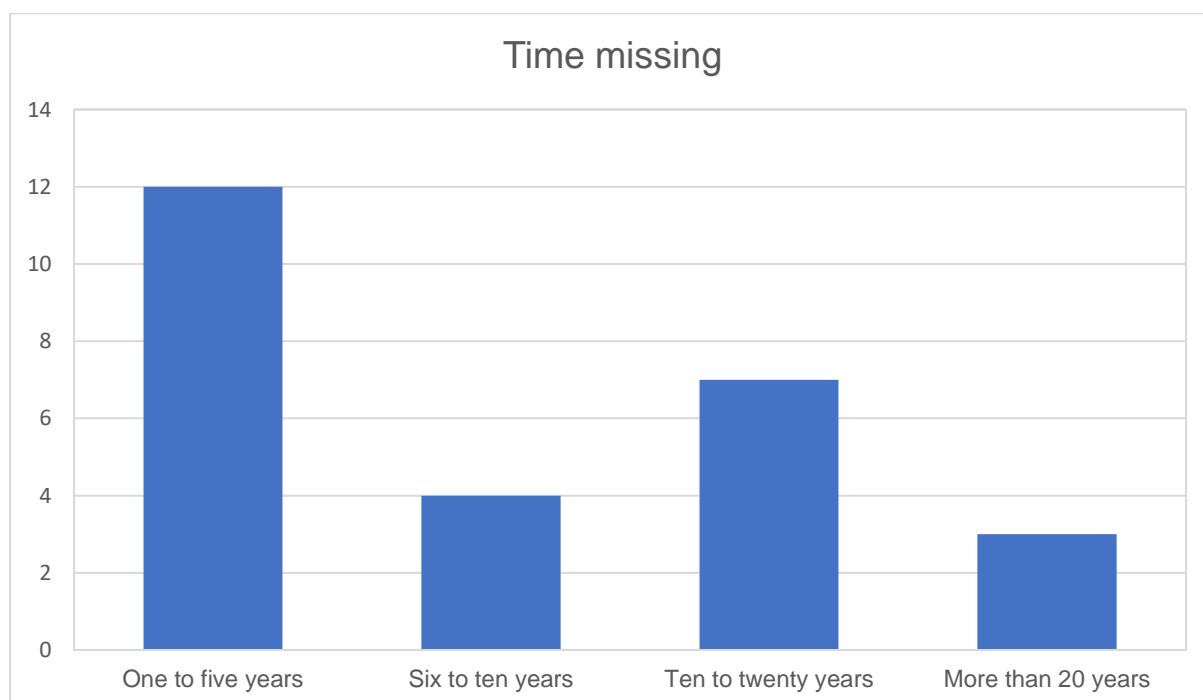

Supplementary Table 5

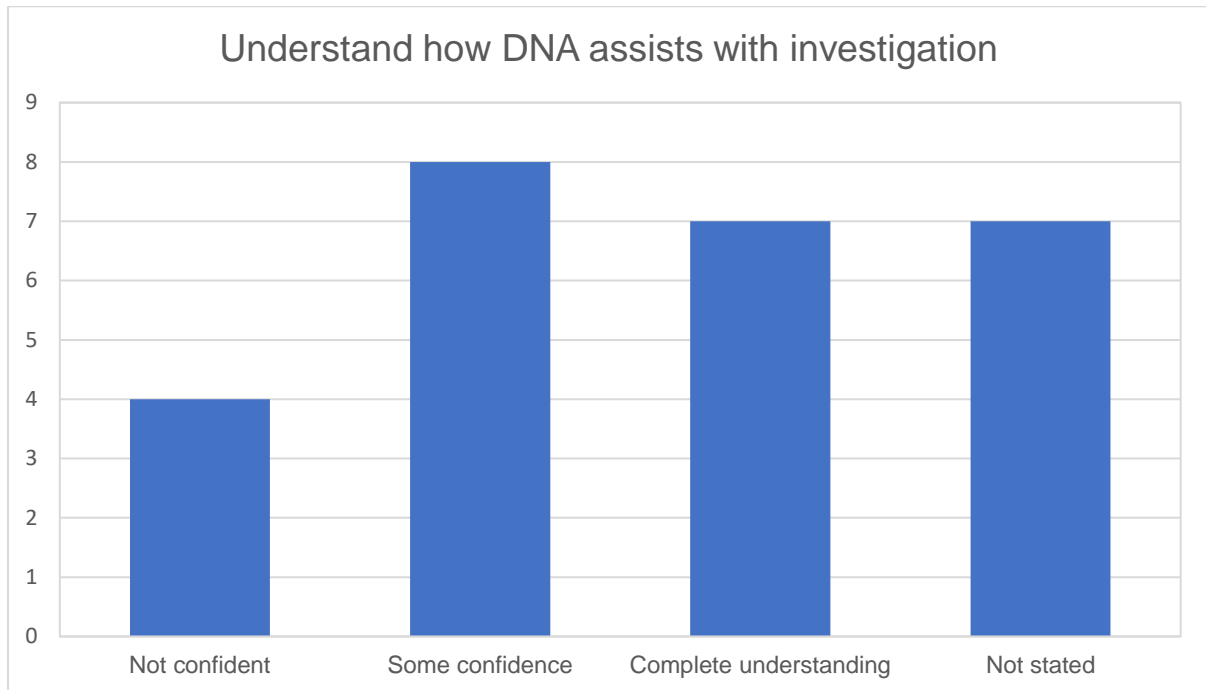

Supplement: Supplementary file [file 34659844]
